# Supplementary material for: Plasma Inflammatory Biomarkers Associated with Advanced Liver Fibrosis in HIV–HCV-Coinfected Individuals
Source: PubMed Central journal article supplement (PMC7766690; doi:10.3390/ijerph17249474), 2020-12-17
Supplement: ijerph-17-09474-s001.pdf [file ijerph-17-09474-s001.pdf]

**Table S1.** Comparison of baseline characteristics between included and excluded group.

|                        | <b>Total</b>     | <b>Excluded</b>  | <b>Included</b>  | <b><i>p</i></b> |
|------------------------|------------------|------------------|------------------|-----------------|
| N                      | 463              | 120              | 343              |                 |
| Age, year              |                  |                  |                  |                 |
| Median (IQR)           | 31.53 ± 7.16     | 31.53 ± 7.31     | 31.53 ± 7.11     | 0.995           |
| Gender                 |                  |                  |                  | 0.999           |
| Male                   | 454 (98.1)       | 118 (98.3)       | 336 (98.0)       |                 |
| Female                 | 9 (1.9)          | 2 (1.7)          | 7 (2.0)          |                 |
| Marital status         |                  |                  |                  | 0.398           |
| Unmarried              | 181 (39.3)       | 51 (43.6)        | 130 (37.9)       |                 |
| Married                | 229 (49.8)       | 51 (43.6)        | 178 (51.9)       |                 |
| Divorced/widowed       | 50 (10.9)        | 15 (12.8)        | 35 (10.2)        |                 |
| Ethnicity              |                  |                  |                  | <0.001          |
| Han                    | 204 (44.3)       | 47 (40.2)        | 157 (45.8)       |                 |
| Dai                    | 140 (30.4)       | 28 (23.9)        | 112 (32.7)       |                 |
| Jingpo                 | 79 (17.2)        | 17 (14.5)        | 62 (18.1)        |                 |
| Others                 | 37 (8.0)         | 25 (21.4)        | 12 (3.5)         |                 |
| HIV transmission route |                  |                  |                  |                 |
| IDU                    | 421 (92.5)       | 107 (95.5)       | 314 (91.5)       | 0.235           |
| Others                 | 42 (7.5)         | 13 (4.5)         | 29 (8.5)         |                 |
| Glucose level          | 5.12(4.23–6.02)  | 5.25(4.19-6.10)  | 5.20 (4.32–6.00) | 0.355           |
| Baseline CD4, cells/ul |                  |                  |                  | 0.243           |
| <200                   | 114 (27.6)       | 16 (21.3)        | 98 (29.0)        |                 |
| 200-349                | 169 (40.9)       | 30 (40.0)        | 139 (41.1)       |                 |
| ≥350                   | 130 (31.5)       | 29 (38.7)        | 101 (29.9)       |                 |
| As continuous          | 275 (192–408)    | 293 (220–437)    | 270 (188–399)    | 0.167           |
| Baseline FIB-4         |                  |                  |                  | 0.846           |
| <1.45                  | 204 (49.9)       | 35 (47.3)        | 169 (50.4)       |                 |
| 1.45-3.25              | 120 (29.3)       | 22 (29.7)        | 98 (29.3)        |                 |
| >3.25                  | 85 (20.8)        | 17 (23.0)        | 68 (20.3)        |                 |
| As continuous          | 1.75 (1.17–2.90) | 1.82 (1.27–3.02) | 1.75 (1.17–2.86) | 0.993           |
| HBsAg positive         |                  |                  |                  | 0.998           |
| Yes                    | 40 (8.6)         | 10 (8.3)         | 30 (8.7)         |                 |
| No                     | 423 (91.4)       | 110 (91.7)       | 313 (91.3)       |                 |
| ART regimen type       |                  |                  |                  | 0.671           |
| NVP (vs EFV/RTV)       | 162 (38.7)       | 26 (34.2)        | 136 (39.7)       |                 |
| TDF (vs AZT/d4T/DDI)   | 182 (43.4)       | 35 (46.1)        | 147 (42.9)       |                 |
| Others                 | 75 (17.9)        | 15 (19.7)        | 60 (17.5)        |                 |
